# Supplementary material for: Synthesis, X-ray characterization and DFT calculations of a series of 3-substituted 4,5-dichloroisothiazoles
Source: Royal Society of Chemistry journal article supplement (doi:10.1039/d3ce00112a), 2023-01-01
Supplement: d3ce00112a1.pdf [file d3ce00112a1.pdf]

## Electronic supplementary materials for the paper

### Synthesis, X-ray characterization and DFT calculations of a series of 3-substituted 4,5-dichloroisothiazole

by Irina A. Kolesnik,<sup>a</sup> Vladimir I. Potkin,<sup>a</sup> Mikhail S. Grigoriev,<sup>b</sup> Anton P. Novikov,<sup>b</sup> Rosa M. Gomila,<sup>c</sup> Alexandra. G. Podrezova,<sup>d</sup> Vadim V. Brazhkin,<sup>e</sup> Fedor I. Zubkov\*,<sup>d</sup> and Antonio Frontera\*,<sup>c</sup>

<sup>a</sup>*Institute of Physical Organic Chemistry of National Academy of Sciences of Belarus, 13 Surganov str., 220072 Minsk, Belarus. Email: irynakolesnik93@gmail.com*

<sup>b</sup>*Frumkin Institute of Physical Chemistry and Electrochemistry, Russian Academy of Sciences, 31 Bldg 4, Leninsky prosp., Moscow, 119071, Russian Federation. Email: mickgrig@mail.ru*

<sup>c</sup>*Department of Chemistry, Universidad de les Islas Baleares, Crta. de Valldemosa km 7.5, 07122 Palma de Mallorca (Balears), Spain. Email: toni.frontera@uib.es*

<sup>d</sup>*Faculty of Science, Peoples' Friendship University of Russia (RUDN University), 6 Miklukho-Maklaya St., 117198 Moscow, Russian Federation. Email: fzubkov@sci.pfu.edu.ru*

<sup>e</sup>*Vereshchagin Institute for High Pressure Physics, Russian Academy of Sciences, Kaluzhskoe shosse 14, 108840 Troitsk, Moscow, Russian Federation. Email: brazhkin@hppi.troitsk.ru*

## TABLE OF CONTENTS

|                           |   |
|---------------------------|---|
| 1. Synthetic details..... | 2 |
| 2. XRD part.....          | 8 |

## 1. Synthetic details

All commercially available reagents and solvents (Acros Organics) were used without further purification. Values of the melting point were measured on Boetius apparatus and on a capillary point apparatus equipped with a digital thermometer (SMP 30) and were left unchanged.  $^1\text{H}$  and  $^{13}\text{C}$  NMR spectra were recorded on 500 (for  $^1\text{H}$ ), 125 (for  $^{13}\text{C}$ ) MHz spectrometers with TMS as an internal standard, using  $\text{CDCl}_3$  as a solvent. Data for  $^1\text{H}$  NMR spectra are reported as follows: chemical shift  $\delta$  (ppm), referenced to TMS; multiplicities are indicated as the following: s, singlet; d, doublet; t, triplet; q, quartet; m, multiplet; coupling constants (Hz) and integration. Data for  $^{13}\text{C}$  NMR spectra are reported in terms of chemical shift  $\delta$  (ppm) relative to residual solvent peaks. IR spectra were obtained in KBr pellets using an FTIR spectrometer Protege-460 (Nicolet). High-resolution MALDI mass spectra were obtained using a Bruker autoflex speed mass spectrometer equipped with a solid body UV-laser ( $\lambda = 355$  nm) and operated in positive reflectron mode. Solutions of the analytes in  $\text{CH}_2\text{Cl}_2$  (2 mg/mL) were mixed with a solution of 2,5-dihydrobeznoic acid in THF (2 mg/mL) and 1  $\mu\text{L}$  of the mixtures were spotted on a steel target plate and air-dried. LC-ESI measurements were carried out on LCMS-8040 Triple quadrupole liquid chromatograph mass spectrometer (Shimadzu) and Kratos MS-30 mass spectrometer (EI, 70 eV). GC-MS studies were performed on an instrument Agilent 5975 inert MSD/6890 N Network GC System (EI ionization at 70 eV), HP-5MS capillary column 30 m  $\times$  0.25 mm, 5% PhMe Silicon stationary phase (0.25 mm), evaporator temperature 250  $^\circ\text{C}$ . HPLS-MS studies were performed using an Agilent 1200 liquid chromatograph with mass-selective detector Agilent 6410 Triple Quad with electrospray ionization (ESI+, scan mode – MS2). Column: Agilent ZORBAX Eclipse XDB-C18 (4.6  $\times$  50 mm, 1.8  $\mu\text{m}$ ). Mobile phase – MeCN– $\text{H}_2\text{O}$ +0.05%  $\text{HCO}_2\text{H}$ , gradient elution from 40 to 90% MeCN in 10 min. Elution rate 0.5 ml/min. Analytical TLC was performed on silica plates Sorbfil (visualization by  $\text{I}_2$  vapors or 0.1 %  $\text{KMnO}_4$  solution). All sample for XRD experiments were obtained by slow evaporation of methanol solutions at r.t.

### Diethyl 4-(4,5-dichloro-1,3,4-thiazol-2-yl)-2,6-dimethyl-1,4-dihydropyridine-3,5-dicarboxylate (1)

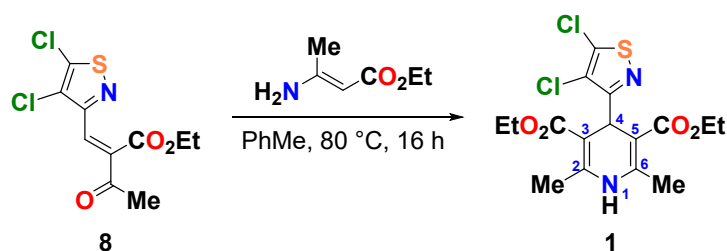

**Scheme S1.** Synthesis of compound 1

A solution of compound **8** (0.61 mmol, 0.18 g) and methyl 3-aminocrotonate (0.73 mmol, 0.10 g) in toluene (5 mL) was stirred at 80 °C for 16 h. After cooling, the target product **1** was filtered off, washed with cold toluene (2 × 1 mL) and dried in vacuo.

Pale yellow powder (0.14 g, 0.35 mmol, 56%), m.p. 172.8–174.0 °C.

<sup>1</sup>H NMR (CDCl<sub>3</sub>, 500 MHz): δ = 6.49 (1H, s, NH), 5.35 (1H, s, CH), 4.05–4.14 (4H, m, CH<sub>2</sub>), 2.29 (6H, s, Me), 1.19 (6H, t, *J* = 7.1 Hz, CH<sub>2</sub>Me). <sup>13</sup>C NMR (CDCl<sub>3</sub>, 125 MHz) δ = 173.3, 167.2, 146.2, 145.9, 123.3, 101.8, 60.1, 37.1, 19.6, 14.5 ppm. IR  $\nu_{\max}$ /cm<sup>-1</sup> (KBr): 3282, 2979, 1705, 1698, 1499, 1200, 1091. GC-MS: found, *m/z*: 404 [M]<sup>+</sup>. C<sub>16</sub>H<sub>18</sub>Cl<sub>2</sub>N<sub>2</sub>O<sub>4</sub>S. Calculated, 404.0364.

### Ethyl 5-acetyl-4-(4,5-dichloroisothiazol-3-yl)-2,6-dimethyl-1,4-dihydropyridine-3-carboxylate (**2**)

---

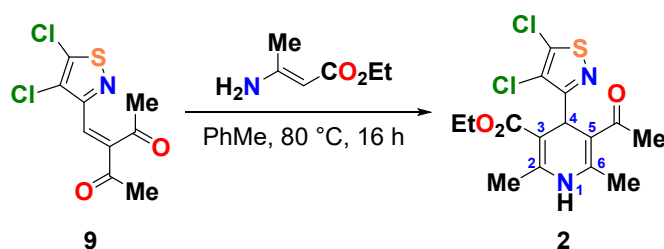

#### Scheme S2. Synthesis of compound **2**

---

A solution of compound **9** (0.72 mmol, 0.19 g) and methyl 3-aminocrotonate (0.72 mmol, 0.09 g) in toluene (5 mL) was stirred at 80 °C for 16 h. After cooling, the target product **2** was filtered off, washed with cold toluene (2 × 1 mL) and dried in vacuo.

Pale yellow powder (0.16 g, 0.43 mmol, 59%), m.p. 205–206 °C.

<sup>1</sup>H NMR (CDCl<sub>3</sub>, 500 MHz): δ = 6.34 (1H, s, NH), 5.42 (1H, s, CH), 4.09–4.16 (2H, m, CH<sub>2</sub>), 2.32 (3H, s, C(O)Me), 2.28 (6H, s, Me), 1.23 (3H, t, *J* = 7.1 Hz, CH<sub>2</sub>Me). <sup>13</sup>C NMR (CDCl<sub>3</sub>, 125 MHz) δ = 197.7, 171.4, 167.1, 147.1, 145.6, 144.6, 122.7, 111.0, 101.7, 60.2, 38.2, 30.4, 20.6, 19.6, 14.6 ppm. IR  $\nu_{\max}$ /cm<sup>-1</sup> (KBr): 3279, 2991, 1697, 1642, 1490, 1209, 1074. MS (ESI): found, *m/z*: 397.1 [M+Na]<sup>+</sup>. C<sub>15</sub>H<sub>16</sub>Cl<sub>2</sub>N<sub>2</sub>O<sub>3</sub>S. Calculated, 374.0259.

### 3,5-Diacetyl-4-(4,5-dichloroisothiazol-3-yl)-2,6-dimethyl-1,4-dihydropyridine (**3**)

---

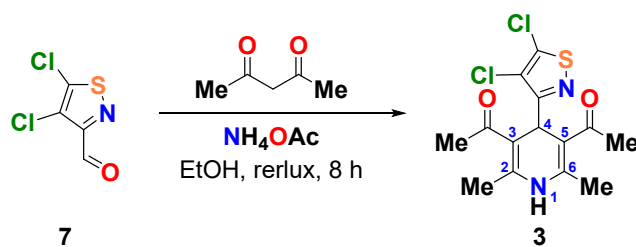

**Scheme S3.** Synthesis of compound **3**

A solution of ammonium acetate (1.00 mmol, 0.08 g), 4,5-dichloroisothiazole-3-carbaldehyde **7** (0.99 mmol, 0.18 g) and acetylacetone (2.00 mmol, 0.20 g) in ethanol (4 mL) was refluxed for 8 h. Then ethanol was evaporated and the crude product was recrystallized from methanol.

Yellow needles (0.17 g, 0.57 mmol, 58%), m.p. 191–192 °C.

$^1\text{H NMR}$  ( $\text{CDCl}_3$ , 500 MHz):  $\delta$  = 6.24 (1H, s, NH), 5.50 (1H, s, CH), 2.32 (6H, s, C(O)Me), 2.30 (6H, s, Me).  $^{13}\text{C NMR}$  ( $\text{CDCl}_3$ , 125 MHz)  $\delta$  = 197.7, 169.7, 148.0, 144.3, 122.5, 110.6, 39.5, 30.3, 20.5 ppm. IR  $\nu_{\text{max}}/\text{cm}^{-1}$  (KBr): 3296, 1625, 1592, 1384, 1218. MS (ESI): found,  $m/z$ : 367.1  $[\text{M}+\text{Na}]^+$ .  $\text{C}_{14}\text{H}_{14}\text{Cl}_2\text{N}_2\text{O}_2\text{S}$ . Calculated, 344.0153.

**5-Acetyl-2-amino-4-(4,5-dichloroisothiazol-3-yl)-6-methyl-4H-pyran-3-carbonitrile (4)**

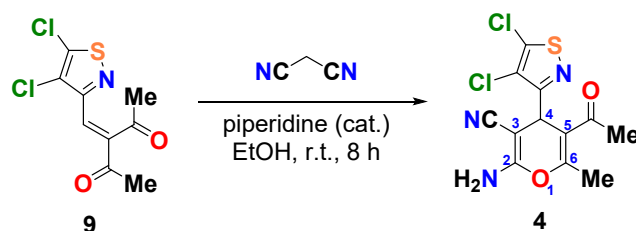

**Scheme S4.** Synthesis of compound **4**

A solution of one drop of piperidine, compound **9** (0.38 mmol, 0.1 g) and malononitrile (0.38 mmol, 24  $\mu\text{L}$ ) in ethanol (3 mL) was stirred at r.t. for 8 h. Then the resulting mixture was diluted with water (7 mL), the precipitate was filtered off, washed with 50% aqueous ethanol ( $2 \times 1$  mL) and dried in vacuo.

Creamy powder (0.08 g, 0.23 mmol, 62%), m.p. 155–156 °C.

$^1\text{H NMR}$  ( $\text{CDCl}_3$ , 500 MHz):  $\delta$  = 4.94 (1H, q,  $J$  = 0.9 Hz, CH), 4.60 (2H, s,  $\text{NH}_2$ ), 2.35 (3H, d,  $J$  = 0.9 Hz, C(O)Me), 2.19 (3H, s, Me).  $^{13}\text{C NMR}$  ( $\text{CDCl}_3$ , 125 MHz)  $\delta$  = 197.0, 166.6, 158.8, 157.5, 149.1, 118.1, 114.0, 112.7, 58.1, 36.6, 30.1, 19.2 ppm. IR  $\nu_{\text{max}}/\text{cm}^{-1}$  (KBr): 3402, 3323, 2924, 2195, 2680, 1649, 1380, 1215. HPLC-MS,  $m/z$  (%): 352  $[\text{M}+\text{Na}]^+$ .  $\text{C}_{12}\text{H}_9\text{Cl}_2\text{N}_3\text{O}_2\text{S}$ . Calculated, 328.9793.

**Ethyl 2-amino-3-cyano-4-(4,5-dichloroisothiazol-3-yl)-6-methyl-4H-pyran-5-carboxylate (5)**


---

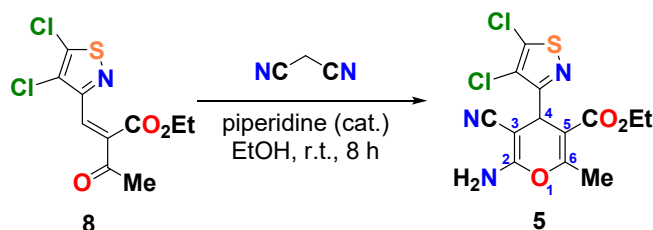
**Scheme S5.** Synthesis of compound **5**


---

A solution of one drop of piperidine, compound **8** (0.51 mmol, 0.15 g) and malononitrile (0.61 mmol, 39  $\mu$ L) in ethanol (3 mL) was stirred at r.t. for 8 h. Then the resulting mixture was poured into water (10 mL) and extracted with diethyl ether ( $2 \times 5$  mL). Combined organic fractions was washed with water ( $2 \times 5$  mL) and dried over Na<sub>2</sub>SO<sub>4</sub>. After removing the solvent, the crude product **5** was recrystallized from methanol.

Creamy lamellar crystals (0.1 g, 0.28 mmol, 56%), m.p. 163–164 °C.

<sup>1</sup>H NMR (CDCl<sub>3</sub>, 500 MHz):  $\delta$  = 4.91 (1H, q,  $J$  = 0.7 Hz, CH), 4.70 (2H, s, NH<sub>2</sub>), 3.99–4.11 (2H, m, CH<sub>2</sub>), 2.42 (3H, d,  $J$  = 0.7 Hz, Me), 1.09 (3H, t,  $J$  = 7.1 Hz, CH<sub>2</sub>Me). <sup>13</sup>C NMR (CDCl<sub>3</sub>, 125 MHz)  $\delta$  = 168.1, 165.3, 159.6, 158.9, 148.2, 122.5, 118.4, 104.9, 61.0, 58.3, 35.5, 18.7, 14.1 ppm. IR  $\nu_{\text{max}}$ /cm<sup>-1</sup> (KBr): 3371, 3178, 2990, 2194, 1694, 1683, 1608, 1267. MALDI-HRMS: found,  $m/z$ : 360 [M+H]<sup>+</sup>. C<sub>13</sub>H<sub>11</sub>Cl<sub>2</sub>N<sub>3</sub>O<sub>3</sub>S. Calculated, 358.9898.

**Ethyl 5-acetyl-2-amino-4-(4,5-dichloroisothiazol-3-yl)-6-methyl-4H-pyran-3-carboxylate (6)**


---

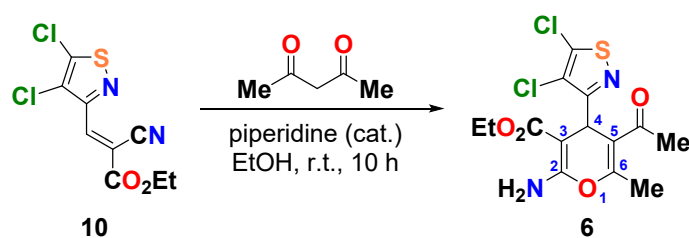
**Scheme S6.** Synthesis of compound **6**


---

A solution of one drop of piperidine, compound **10** (0.97 mmol, 0.27 g) and acetylacetone (0.97 mmol, 100  $\mu$ L) in ethanol (3 mL) was stirred at r.t. for 10 h. Then the resulting mixture was poured into water (10 mL) and extracted with diethyl ether ( $2 \times 5$  mL). Combined organic fractions were washed with

water (2 × 5 mL) and dried over Na<sub>2</sub>SO<sub>4</sub>. After removing the solvent, a crude product **6** was washed with cold methanol (2 × 1 mL) and dried in the air.

White powder (0.28 g, 0.74 mmol, 76%), m.p. 142–143 °C.

<sup>1</sup>H NMR (CDCl<sub>3</sub>, 500 MHz): δ = 6.25 (2H, s, NH<sub>2</sub>), 5.14 (1H, q, *J* = 0.7 Hz, CH), 4.04–4.14 (2H, m, CH<sub>2</sub>), 2.30 (3H, s, C(O)Me), 2.29 (3H, d, *J* = 0.7 Hz, Me), 1.17 (3H, t, *J* = 7.1 Hz, CH<sub>2</sub>Me). <sup>13</sup>C NMR (CDCl<sub>3</sub>, 125 MHz) δ = 198.5, 169.4, 168.6, 159.4, 156.8, 147.5, 123.0, 115.5, 76.6, 59.9, 36.0, 30.54, 19.2, 14.6 ppm. IR ν<sub>max</sub>/cm<sup>-1</sup> (KBr): 3391, 3314, 3295, 2990, 1693, 1635, 1192. MS (ESI): *m/z*: 377 [M+H]<sup>+</sup>. C<sub>14</sub>H<sub>14</sub>Cl<sub>2</sub>N<sub>2</sub>O<sub>4</sub>S. Calculated, 376.0051.

### Ethyl 2-[(4,5-dichloroisothiazol-3-yl)methylene]-3-oxobutanoate (**8**)

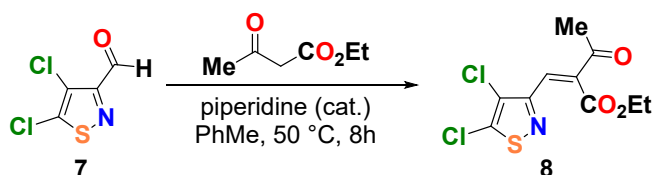

#### Scheme S7. Synthesis of compound **8**

A solution of one drop of piperidine, compound **7** (1.65 mmol, 0.30 g) and acetoacetic ester (1.65 mmol, 210 μL) in toluene (15 mL) was stirred at 50 °C for 8 h. Then the resulting mixture was washed with a diluted HCl solution (1 × 10 mL), water (1 × 10 mL), a sat. solution of NaHCO<sub>3</sub> (1 × 10 mL) and dried over Na<sub>2</sub>SO<sub>4</sub>. After removing the solvent, the crude product **8** was recrystallized from hexane.

Creamy powder (0.39 g, 1.32 mmol, 80%), m.p. 88–89 °C.

<sup>1</sup>H NMR (CDCl<sub>3</sub>, 500 MHz): δ = 7.47 (1H, s, CH), 4.37 (2H, q, *J* = 7.2 Hz, CH<sub>2</sub>), 2.44 (3H, s, C(O)Me), 1.32 (3H, t, *J* = 7.2 Hz, CH<sub>2</sub>Me). <sup>13</sup>C NMR (CDCl<sub>3</sub>, 125 MHz) δ = 193.8, 166.8, 157.7, 149.1, 138.3, 126.7, 125.5, 62.1, 27.0, 14.1 ppm. IR ν<sub>max</sub>/cm<sup>-1</sup> (KBr): 3448, 3324, 2987, 1736, 1669, 1356, 1321, 1222. GC-MS: found, *m/z*: 293 [M]<sup>+</sup>. C<sub>10</sub>H<sub>9</sub>Cl<sub>2</sub>NO<sub>3</sub>S. Calculated, 293.0.

### 3-[(4,5-Dichloroisothiazol-3-yl)methylene]pentane-2,4-dione (**9**)

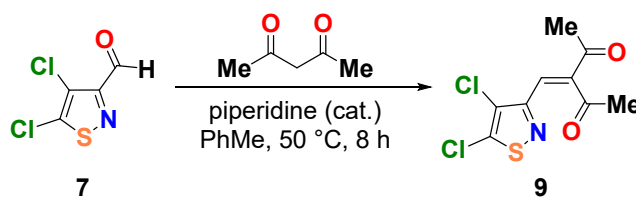

**Scheme S8.** Synthesis of compound **9**

A solution of one drop of piperidine, compound **7** (1.10 mmol, 0.20 g) and acetylacetone (1.15 mmol, 114  $\mu$ L) in toluene (5 mL) and the reaction mixture was stirred at 50 °C for 8 h. Then the resulting mixture was washed with a diluted HCl solution (1  $\times$  10 mL), water (1  $\times$  10 mL), a sat. solution of NaHCO<sub>3</sub> (1  $\times$  10 mL) and dried over Na<sub>2</sub>SO<sub>4</sub>. After removing the solvent, the crude product **9** was recrystallized from hexane.

Yellowish lamellar crystals (0.26 g, 0.99 mmol, 90%), m.p. 92–94 °C.

<sup>1</sup>H NMR (CDCl<sub>3</sub>, 500 MHz):  $\delta$  = 7.32 (1H, s, CH), 2.44 (3H, s, Me), 2.43 (3H, s, Me). <sup>13</sup>C NMR (CDCl<sub>3</sub>, 125 MHz)  $\delta$  = 203.6, 195.9, 157.8, 149.4, 146.6, 125.2, 125.1, 31.4, 26.8 ppm. IR  $\nu_{\text{max}}$ /cm<sup>-1</sup> (KBr): 3400, 3304, 2925, 1711, 1663, 1360, 1319, 1176. GC-MS: found,  $m/z$ : 263 [M]<sup>+</sup>. C<sub>9</sub>H<sub>7</sub>Cl<sub>2</sub>NO<sub>2</sub>S. Calculated, 263.0.

### Ethyl 2-cyano-3-(4,5-dichloroisothiazol-3-yl)acrylate (**10**)

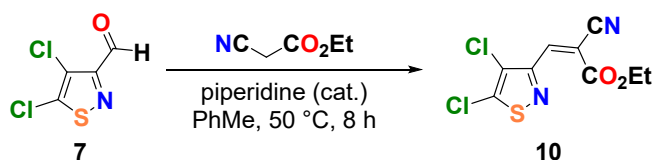

**Scheme S9.** Synthesis of compound **10**

A solution of one drop of piperidine, compound **7** (2.80 mmol, 0.51 g) and ethyl cyanoacetate (2.80 mmol, 300  $\mu$ L) in toluene (10 mL) and the reaction mixture was stirred at 50 °C for 8 h. Then the resulting mixture was washed with a diluted HCl solution (1  $\times$  10 mL), water (1  $\times$  10 mL), a sat. solution of NaHCO<sub>3</sub> (1  $\times$  10 mL) and dried over Na<sub>2</sub>SO<sub>4</sub>. After removing the solvent, the crude product **10** was recrystallized from hexane.

Creamy needles (0.73 g, 2.63 mmol, 94%), m.p. 84–85 °C.

<sup>1</sup>H NMR (CDCl<sub>3</sub>, 500 MHz):  $\delta$  = 8.19 (1H, s, CH), 4.42 (2H, q,  $J$  = 7.1 Hz, CH<sub>2</sub>), 1.41 (3H, t,  $J$  = 7.1 Hz, Me). <sup>13</sup>C NMR (CDCl<sub>3</sub>, 125 MHz)  $\delta$  = 195.9, 161.5, 156.0, 150.3, 140.1, 114.1, 109.6, 63.6, 14.3

ppm. IR  $\nu_{\max}/\text{cm}^{-1}$  (KBr): 3428, 3000, 2229, 1724, 1368, 1327, 1257, 1001, 1086. GC-MS: found,  $m/z$ : 276  $[\text{M}]^+$ .  $\text{C}_9\text{H}_6\text{Cl}_2\text{N}_2\text{O}_2\text{S}$ . Calculated, 276.0.



## 2. XRD part

The crystal structure of heterocycles **2**, **3**, **5** and **6** was determined by X-ray structural analysis using an automatic four-circle area-detector diffractometer Bruker KAPPA APEX II with MoK $\alpha$  radiation. The crystal structure **1** and **4** was determined by X-ray structural analysis using XtaLAB Synergy, Dualflex, HyPix with CuK $\alpha$  radiation. The cell parameters of **2**, **3**, **5** and **6** were refined over the entire data set, together with data reduction using SAINT-Plus software.<sup>1</sup> Absorption corrections of **2**, **3**, **5** and **6** were introduced using the SADABS program.<sup>2</sup> The structures were solved using the SHELXT-2018/2 program<sup>3</sup> and refined by full-matrix least squares on  $F^2$  in the anisotropic approximation for all non-hydrogen atoms (SHELXL-2018/3).<sup>4</sup> The C-H bonded hydrogen atoms were placed in geometrically calculated positions and refined in an idealized geometry with isotropic temperature factors equal to 1.2Ueq(C) for CH and CH<sub>2</sub>-groups, and 1.5Ueq(C) for CH<sub>3</sub>-groups. The N-H bonded atoms were objectively located from the difference Fourier synthesis and refined with isotropic temperature factors equal to 1.2Ueq(N) for NH and NH<sub>2</sub>-groups. The orientation of CH<sub>3</sub>-groups was refined. Structures **3** and **6** were refined as inversion twins. Tables and figures for the structures were generated using Olex2.<sup>5</sup>

Crystal data, data collection, and structure refinement details are summarized in Table 1 (see the main part of the paper). All other crystallographic parameters of the structures are indicated below in Tables S1–S24. The atomic coordinates were deposited at the Cambridge Crystallographic Data Centre (CCDC).<sup>6</sup> CCDC numbers are 2213501–2213504 for **2**, **3**, **5**, **6**, correspondingly and 2243955–2243956 for **1** and **4**.

1. Bruker AXS Inc.: Madison, WI, U. SAINT, V8.40B 2020.
2. L. Krause, R. Herbst-Irmer, G. M. Sheldrick and D. Stalke, *J. Appl. Crystallogr.*, 2015, **48**, 3–10.
3. G. M. Sheldrick, *Acta Crystallogr. A*, 2015, **A71**, 3–8.
4. G. M. Sheldrick, *Acta Crystallogr. C*, 2015, **C71**, 3–8.
5. O. V. Dolomanov, L. J. Bourhis, R. J. Gildea, J. A. K. Howard and H. Puschmann, *J. Appl. Crystallogr.*, 2009, **42**, 339–341.

6. C. R. Groom, I. J. Bruno, M. P. Lightfoot and S. C. Ward, *Acta Crystallogr. B*, 2016, **72**, 171–179.

**Table S1.** Bond Lengths for **1**.

| Atom | Atom | Length/Å   | Atom | Atom | Length/Å |
|------|------|------------|------|------|----------|
| C11  | C11  | 1.7098(16) | C1   | C2   | 1.505(2) |
| C12  | C12  | 1.7007(16) | C2   | C3   | 1.357(2) |
| S1   | N2   | 1.6569(14) | C3   | C4   | 1.530(2) |
| S1   | C12  | 1.7051(17) | C3   | C7   | 1.472(2) |
| O1   | C7   | 1.211(2)   | C4   | C5   | 1.529(2) |
| O2   | C7   | 1.357(2)   | C4   | C10  | 1.520(2) |
| O2   | C8   | 1.4501(19) | C5   | C6   | 1.355(2) |
| O3   | C13  | 1.212(2)   | C5   | C13  | 1.471(2) |
| O4   | C13  | 1.3545(19) | C6   | C16  | 1.504(2) |
| O4   | C14  | 1.4533(19) | C8   | C9   | 1.512(3) |
| N1   | C2   | 1.379(2)   | C10  | C11  | 1.431(2) |
| N1   | C6   | 1.376(2)   | C11  | C12  | 1.367(2) |
| N2   | C10  | 1.322(2)   | C14  | C15  | 1.508(2) |

**Table S2.** Bond Angles for **1**.

| Atom | Atom | Atom | Angle/°    | Atom | Atom | Atom | Angle/°    |
|------|------|------|------------|------|------|------|------------|
| N2   | S1   | C12  | 94.13(7)   | C5   | C6   | C16  | 127.50(14) |
| C7   | O2   | C8   | 116.69(13) | O1   | C7   | O2   | 122.56(15) |
| C13  | O4   | C14  | 114.02(13) | O1   | C7   | C3   | 127.83(15) |
| C6   | N1   | C2   | 124.15(14) | O2   | C7   | C3   | 109.60(13) |
| C10  | N2   | S1   | 111.29(11) | O2   | C8   | C9   | 109.91(14) |
| N1   | C2   | C1   | 112.78(14) | N2   | C10  | C4   | 119.43(13) |
| C3   | C2   | N1   | 119.96(14) | N2   | C10  | C11  | 113.97(14) |
| C3   | C2   | C1   | 127.23(15) | C11  | C10  | C4   | 126.59(14) |
| C2   | C3   | C4   | 120.86(14) | C10  | C11  | C11  | 125.81(12) |
| C2   | C3   | C7   | 121.37(14) | C12  | C11  | C11  | 123.04(13) |
| C7   | C3   | C4   | 117.63(13) | C12  | C11  | C10  | 111.13(14) |
| C5   | C4   | C3   | 111.86(13) | C12  | C12  | S1   | 123.01(10) |
| C10  | C4   | C3   | 109.62(12) | C11  | C12  | C12  | 127.50(13) |
| C10  | C4   | C5   | 110.60(12) | C11  | C12  | S1   | 109.48(12) |
| C6   | C5   | C4   | 121.07(14) | O3   | C13  | O4   | 121.65(14) |
| C6   | C5   | C13  | 120.62(14) | O3   | C13  | C5   | 126.68(15) |
| C13  | C5   | C4   | 118.25(13) | O4   | C13  | C5   | 111.67(13) |
| N1   | C6   | C16  | 112.78(14) | O4   | C14  | C15  | 108.16(14) |
| C5   | C6   | N1   | 119.69(14) |      |      |      |            |

**Table S3.** Hydrogen Bonds for **1**.

| D  | H   | A               | d(D-H)/Å | d(H-A)/Å | d(D-A)/Å | D-H-A/° |
|----|-----|-----------------|----------|----------|----------|---------|
| N1 | H1  | N2 <sup>1</sup> | 0.90(2)  | 2.10(2)  | 3.000(2) | 178(2)  |
| C1 | H1B | O1              | 0.98     | 2.16     | 2.866(2) | 127     |

|     |      |    |      |      |          |     |
|-----|------|----|------|------|----------|-----|
| C16 | H16B | O3 | 0.98 | 2.33 | 2.827(2) | 111 |
|-----|------|----|------|------|----------|-----|

<sup>12</sup>-X,1-Y,1-Z

**Table S4.** Torsion Angles for **1**.

| A   | B   | C   | D   | Angle/°     | A   | B   | C   | D   | Angle/°     |
|-----|-----|-----|-----|-------------|-----|-----|-----|-----|-------------|
| C11 | C11 | C12 | C12 | 0.6(2)      | C4  | C5  | C13 | O3  | 175.07(15)  |
| C11 | C11 | C12 | S1  | 179.14(9)   | C4  | C5  | C13 | O4  | -5.3(2)     |
| S1  | N2  | C10 | C4  | -178.14(11) | C4  | C10 | C11 | C11 | -0.7(2)     |
| S1  | N2  | C10 | C11 | 0.38(17)    | C4  | C10 | C11 | C12 | 177.60(14)  |
| N1  | C2  | C3  | C4  | -2.3(2)     | C5  | C4  | C10 | N2  | -62.28(17)  |
| N1  | C2  | C3  | C7  | -177.85(13) | C5  | C4  | C10 | C11 | 119.41(16)  |
| N2  | S1  | C12 | C12 | 178.10(11)  | C6  | N1  | C2  | C1  | 169.59(14)  |
| N2  | S1  | C12 | C11 | -0.53(13)   | C6  | N1  | C2  | C3  | -8.6(2)     |
| N2  | C10 | C11 | C11 | -179.07(11) | C6  | C5  | C13 | O3  | -7.5(3)     |
| N2  | C10 | C11 | C12 | -0.79(19)   | C6  | C5  | C13 | O4  | 172.10(14)  |
| C1  | C2  | C3  | C4  | 179.78(14)  | C7  | O2  | C8  | C9  | 86.51(18)   |
| C1  | C2  | C3  | C7  | 4.2(2)      | C7  | C3  | C4  | C5  | -170.48(13) |
| C2  | N1  | C6  | C5  | 5.7(2)      | C7  | C3  | C4  | C10 | 66.46(17)   |
| C2  | N1  | C6  | C16 | -172.48(14) | C8  | O2  | C7  | O1  | 6.7(2)      |
| C2  | C3  | C4  | C5  | 13.8(2)     | C8  | O2  | C7  | C3  | -171.85(13) |
| C2  | C3  | C4  | C10 | -109.26(16) | C10 | C4  | C5  | C6  | 105.77(16)  |
| C2  | C3  | C7  | O1  | 0.7(3)      | C10 | C4  | C5  | C13 | -76.84(17)  |
| C2  | C3  | C7  | O2  | 179.14(14)  | C10 | C11 | C12 | C12 | -177.75(12) |
| C3  | C4  | C5  | C6  | -16.7(2)    | C10 | C11 | C12 | S1  | 0.81(17)    |
| C3  | C4  | C5  | C13 | 160.66(13)  | C12 | S1  | N2  | C10 | 0.08(12)    |
| C3  | C4  | C10 | N2  | 61.53(18)   | C13 | O4  | C14 | C15 | 175.84(14)  |
| C3  | C4  | C10 | C11 | -116.79(16) | C13 | C5  | C6  | N1  | -169.32(14) |
| C4  | C3  | C7  | O1  | -175.04(16) | C13 | C5  | C6  | C16 | 8.5(2)      |
| C4  | C3  | C7  | O2  | 3.45(19)    | C14 | O4  | C13 | O3  | 6.8(2)      |
| C4  | C5  | C6  | N1  | 8.0(2)      | C14 | O4  | C13 | C5  | -172.84(14) |
| C4  | C5  | C6  | C16 | -174.16(15) |     |     |     |     |             |

**Table S5.** Bond Lengths for **2**.

| Atom | Atom | Length/Å | Atom | Atom | Length/Å |
|------|------|----------|------|------|----------|
| C11  | C16  | 1.703(4) | C2   | C7   | 1.501(4) |
| C12  | C15  | 1.720(3) | C3   | C4   | 1.528(4) |
| S1   | N2   | 1.651(3) | C3   | C8   | 1.456(4) |
| S1   | C16  | 1.709(3) | C4   | C5   | 1.523(4) |
| O1   | C8   | 1.245(3) | C4   | C14  | 1.512(5) |
| O2   | C10  | 1.222(4) | C5   | C6   | 1.363(4) |
| O3   | C10  | 1.359(4) | C5   | C10  | 1.467(4) |
| O3   | C11  | 1.458(4) | C6   | C13  | 1.498(4) |

|    |     |          |     |     |          |
|----|-----|----------|-----|-----|----------|
| N1 | C2  | 1.370(4) | C8  | C9  | 1.504(5) |
| N1 | C6  | 1.379(4) | C11 | C12 | 1.509(5) |
| N2 | C14 | 1.329(4) | C14 | C15 | 1.442(4) |
| C2 | C3  | 1.371(4) | C15 | C16 | 1.357(5) |

**Table S6.** Bond Angles for **2**.

| Atom | Atom | Atom | Angle/°   | Atom | Atom | Atom | Angle/°  |
|------|------|------|-----------|------|------|------|----------|
| N2   | S1   | C16  | 94.65(15) | C5   | C6   | C13  | 127.5(3) |
| C10  | O3   | C11  | 115.1(2)  | O1   | C8   | C3   | 118.9(3) |
| C2   | N1   | C6   | 124.2(2)  | O1   | C8   | C9   | 118.2(3) |
| C14  | N2   | S1   | 111.1(2)  | C3   | C8   | C9   | 122.9(3) |
| N1   | C2   | C3   | 118.0(3)  | O2   | C10  | O3   | 121.6(3) |
| N1   | C2   | C7   | 113.4(2)  | O2   | C10  | C5   | 127.4(3) |
| C3   | C2   | C7   | 128.6(3)  | O3   | C10  | C5   | 110.9(3) |
| C2   | C3   | C4   | 118.4(2)  | O3   | C11  | C12  | 107.9(3) |
| C2   | C3   | C8   | 124.8(3)  | N2   | C14  | C4   | 119.2(3) |
| C8   | C3   | C4   | 116.8(2)  | N2   | C14  | C15  | 113.5(3) |
| C5   | C4   | C3   | 110.0(3)  | C15  | C14  | C4   | 127.4(3) |
| C14  | C4   | C3   | 111.1(3)  | C14  | C15  | C12  | 124.9(3) |
| C14  | C4   | C5   | 110.5(3)  | C16  | C15  | C12  | 123.5(3) |
| C6   | C5   | C4   | 118.2(3)  | C16  | C15  | C14  | 111.6(3) |
| C6   | C5   | C10  | 122.1(3)  | C11  | C16  | S1   | 122.9(2) |
| C10  | C5   | C4   | 119.3(3)  | C15  | C16  | C11  | 127.9(2) |
| N1   | C6   | C13  | 113.5(2)  | C15  | C16  | S1   | 109.2(2) |
| C5   | C6   | N1   | 118.9(3)  |      |      |      |          |

**Table S7.** Hydrogen Bonds for **2**.

| D  | H  | A               | d(D-H)/Å | d(H-A)/Å | d(D-A)/Å | D-H-A/° |
|----|----|-----------------|----------|----------|----------|---------|
| N1 | H1 | O1 <sup>1</sup> | 0.80(3)  | 2.05(3)  | 2.819(3) | 162(4)  |

<sup>1</sup>-1+X,+Y,+Z
**Table S8.** Torsion Angles for **2**.

| A   | B   | C   | D   | Angle/°    | A  | B   | C   | D   | Angle/°  |
|-----|-----|-----|-----|------------|----|-----|-----|-----|----------|
| C12 | C15 | C16 | C11 | 1.0(5)     | C4 | C5  | C10 | O2  | 174.2(3) |
| C12 | C15 | C16 | S1  | 179.71(18) | C4 | C5  | C10 | O3  | -5.2(4)  |
| S1  | N2  | C14 | C4  | -178.9(2)  | C4 | C14 | C15 | C12 | -0.5(5)  |
| S1  | N2  | C14 | C15 | 0.4(3)     | C4 | C14 | C15 | C16 | 178.5(3) |
| N1  | C2  | C3  | C4  | -14.2(5)   | C5 | C4  | C14 | N2  | -52.1(4) |
| N1  | C2  | C3  | C8  | 162.8(3)   | C5 | C4  | C14 | C15 | 128.7(3) |
| N2  | S1  | C16 | C11 | 178.4(2)   | C6 | N1  | C2  | C3  | -14.9(5) |
| N2  | S1  | C16 | C15 | -0.4(3)    | C6 | N1  | C2  | C7  | 164.4(3) |

|    |     |     |     |           |     |     |     |     |           |
|----|-----|-----|-----|-----------|-----|-----|-----|-----|-----------|
| N2 | C14 | C15 | Cl2 | -179.8(2) | C6  | C5  | C10 | O2  | 1.1(6)    |
| N2 | C14 | C15 | C16 | -0.7(4)   | C6  | C5  | C10 | O3  | -178.2(3) |
| C2 | N1  | C6  | C5  | 17.7(5)   | C7  | C2  | C3  | C4  | 166.7(3)  |
| C2 | N1  | C6  | C13 | -160.5(3) | C7  | C2  | C3  | C8  | -16.3(6)  |
| C2 | C3  | C4  | C5  | 36.2(4)   | C8  | C3  | C4  | C5  | -141.0(3) |
| C2 | C3  | C4  | C14 | -86.4(3)  | C8  | C3  | C4  | C14 | 96.4(3)   |
| C2 | C3  | C8  | O1  | 174.4(3)  | C10 | O3  | C11 | C12 | -175.4(3) |
| C2 | C3  | C8  | C9  | -8.9(5)   | C10 | C5  | C6  | N1  | -177.9(3) |
| C3 | C4  | C5  | C6  | -33.4(4)  | C10 | C5  | C6  | C13 | 0.0(6)    |
| C3 | C4  | C5  | C10 | 153.2(3)  | C11 | O3  | C10 | O2  | -2.2(5)   |
| C3 | C4  | C14 | N2  | 70.3(3)   | C11 | O3  | C10 | C5  | 177.2(3)  |
| C3 | C4  | C14 | C15 | -108.9(3) | C14 | C4  | C5  | C6  | 89.6(4)   |
| C4 | C3  | C8  | O1  | -8.6(5)   | C14 | C4  | C5  | C10 | -83.7(3)  |
| C4 | C3  | C8  | C9  | 168.1(3)  | C14 | C15 | C16 | C11 | -178.0(2) |
| C4 | C5  | C6  | N1  | 9.0(5)    | C14 | C15 | C16 | S1  | 0.7(3)    |
| C4 | C5  | C6  | C13 | -173.1(3) | C16 | S1  | N2  | C14 | 0.0(3)    |

**Table S9.** Bond Lengths for **3**.

| Atom | Atom | Length/Å | Atom | Atom | Length/Å |
|------|------|----------|------|------|----------|
| Cl1  | C14  | 1.719(5) | Cl21 | C34  | 1.707(5) |
| Cl2  | C15  | 1.705(5) | Cl22 | C35  | 1.697(5) |
| S1   | N2   | 1.656(4) | S21  | N22  | 1.657(4) |
| S1   | C15  | 1.707(5) | S21  | C35  | 1.717(5) |
| O1   | C8   | 1.233(5) | O21  | C28  | 1.234(5) |
| O2   | C10  | 1.228(6) | O22  | C30  | 1.225(5) |
| N1   | C2   | 1.370(6) | N21  | C22  | 1.366(6) |
| N1   | C6   | 1.391(6) | N21  | C26  | 1.382(6) |
| N2   | C13  | 1.325(6) | N22  | C33  | 1.320(5) |
| C2   | C3   | 1.369(6) | C22  | C23  | 1.369(6) |
| C2   | C7   | 1.498(6) | C22  | C27  | 1.505(6) |
| C3   | C4   | 1.517(6) | C23  | C24  | 1.515(6) |
| C3   | C8   | 1.460(6) | C23  | C28  | 1.464(6) |
| C4   | C5   | 1.523(6) | C24  | C25  | 1.514(6) |
| C4   | C13  | 1.522(6) | C24  | C33  | 1.521(6) |
| C5   | C6   | 1.350(6) | C25  | C26  | 1.370(6) |
| C5   | C10  | 1.470(6) | C25  | C30  | 1.471(7) |
| C6   | C12  | 1.508(6) | C26  | C32  | 1.502(6) |
| C8   | C9   | 1.505(6) | C28  | C29  | 1.499(6) |
| C10  | C11  | 1.497(7) | C30  | C31  | 1.504(6) |
| C13  | C14  | 1.424(6) | C33  | C34  | 1.422(6) |
| C14  | C15  | 1.356(6) | C34  | C35  | 1.368(7) |

**Table S10.** Bond Angles for **3**.

| Atom | Atom | Atom | Angle/°  | Atom | Atom | Atom | Angle/°  |
|------|------|------|----------|------|------|------|----------|
| N2   | S1   | C15  | 94.5(2)  | N22  | S21  | C35  | 94.3(2)  |
| C2   | N1   | C6   | 125.0(4) | C22  | N21  | C26  | 124.7(4) |
| C13  | N2   | S1   | 110.3(3) | C33  | N22  | S21  | 110.6(4) |
| N1   | C2   | C7   | 113.2(4) | N21  | C22  | C23  | 118.3(4) |
| C3   | C2   | N1   | 117.8(4) | N21  | C22  | C27  | 113.0(4) |
| C3   | C2   | C7   | 129.0(4) | C23  | C22  | C27  | 128.7(4) |
| C2   | C3   | C4   | 118.1(4) | C22  | C23  | C24  | 118.2(4) |
| C2   | C3   | C8   | 126.0(4) | C22  | C23  | C28  | 126.0(4) |
| C8   | C3   | C4   | 115.8(4) | C28  | C23  | C24  | 115.7(4) |
| C3   | C4   | C5   | 112.0(4) | C23  | C24  | C33  | 110.5(4) |
| C3   | C4   | C13  | 110.0(4) | C25  | C24  | C23  | 112.4(4) |
| C13  | C4   | C5   | 110.6(3) | C25  | C24  | C33  | 110.8(3) |
| C6   | C5   | C4   | 118.5(4) | C26  | C25  | C24  | 118.2(4) |
| C6   | C5   | C10  | 127.7(4) | C26  | C25  | C30  | 127.7(4) |
| C10  | C5   | C4   | 113.6(4) | C30  | C25  | C24  | 114.0(4) |
| N1   | C6   | C12  | 112.6(4) | N21  | C26  | C32  | 113.0(4) |
| C5   | C6   | N1   | 118.5(4) | C25  | C26  | N21  | 118.8(4) |
| C5   | C6   | C12  | 128.8(4) | C25  | C26  | C32  | 128.2(4) |
| O1   | C8   | C3   | 118.9(4) | O21  | C28  | C23  | 118.5(4) |
| O1   | C8   | C9   | 117.8(4) | O21  | C28  | C29  | 117.7(4) |
| C3   | C8   | C9   | 123.2(4) | C23  | C28  | C29  | 123.7(4) |
| O2   | C10  | C5   | 118.5(4) | O22  | C30  | C25  | 118.1(4) |
| O2   | C10  | C11  | 118.2(4) | O22  | C30  | C31  | 118.8(4) |
| C5   | C10  | C11  | 123.3(4) | C25  | C30  | C31  | 123.1(4) |
| N2   | C13  | C4   | 119.4(4) | N22  | C33  | C24  | 119.1(4) |
| N2   | C13  | C14  | 114.5(5) | N22  | C33  | C34  | 114.9(5) |
| C14  | C13  | C4   | 126.1(4) | C34  | C33  | C24  | 125.9(4) |
| C13  | C14  | Cl1  | 125.5(4) | C33  | C34  | Cl21 | 126.9(4) |
| C15  | C14  | Cl1  | 123.0(4) | C35  | C34  | Cl21 | 121.9(4) |
| C15  | C14  | C13  | 111.5(4) | C35  | C34  | C33  | 111.2(4) |
| Cl2  | C15  | S1   | 124.2(3) | Cl22 | C35  | S21  | 123.3(3) |
| C14  | C15  | Cl2  | 126.6(4) | C34  | C35  | Cl22 | 127.8(4) |
| C14  | C15  | S1   | 109.1(3) | C34  | C35  | S21  | 108.9(4) |

**Table S11.** Hydrogen Bonds for **3**.

| D   | H    | A                | d(D-H)/Å | d(H-A)/Å | d(D-A)/Å | D-H-A/° |
|-----|------|------------------|----------|----------|----------|---------|
| N1  | H1   | O1 <sup>1</sup>  | 0.80(3)  | 2.04(4)  | 2.825(5) | 169(5)  |
| C4  | H4A  | Cl1              | 1.00     | 2.82     | 3.325(4) | 111.8   |
| C11 | H11C | O22 <sup>2</sup> | 0.98     | 2.58     | 3.554(6) | 171.4   |
| N21 | H21  | O21 <sup>1</sup> | 0.79(3)  | 2.09(4)  | 2.871(5) | 170(5)  |
| C27 | H27B | O21 <sup>1</sup> | 0.98     | 2.56     | 3.403(5) | 144.6   |
| C31 | H31C | O2 <sup>3</sup>  | 0.98     | 2.57     | 3.546(6) | 178.6   |

$^1-1+X,+Y,+Z; ^21-X,1/2+Y,2-Z; ^31-X,-1/2+Y,2-Z$ 
**Table S12.** Torsion Angles for **3**.

| A   | B   | C   | D   | Angle/°   | A    | B   | C   | D    | Angle/°   |
|-----|-----|-----|-----|-----------|------|-----|-----|------|-----------|
| C11 | C14 | C15 | C12 | 2.6(6)    | C121 | C34 | C35 | C122 | 1.6(6)    |
| C11 | C14 | C15 | S1  | -179.6(3) | C121 | C34 | C35 | S21  | -178.8(3) |
| S1  | N2  | C13 | C4  | 179.0(3)  | S21  | N22 | C33 | C24  | -179.3(3) |
| S1  | N2  | C13 | C14 | -0.4(5)   | S21  | N22 | C33 | C34  | 0.1(5)    |
| N1  | C2  | C3  | C4  | 15.4(6)   | N21  | C22 | C23 | C24  | -14.5(6)  |
| N1  | C2  | C3  | C8  | -159.9(5) | N21  | C22 | C23 | C28  | 164.3(5)  |
| N2  | S1  | C15 | C12 | 178.2(3)  | N22  | S21 | C35 | C122 | 179.9(3)  |
| N2  | S1  | C15 | C14 | 0.4(3)    | N22  | S21 | C35 | C34  | 0.3(4)    |
| N2  | C13 | C14 | C11 | 179.7(3)  | N22  | C33 | C34 | C121 | 178.6(3)  |
| N2  | C13 | C14 | C15 | 0.8(6)    | N22  | C33 | C34 | C35  | 0.1(6)    |
| C2  | N1  | C6  | C5  | -17.3(7)  | C22  | N21 | C26 | C25  | 17.2(7)   |
| C2  | N1  | C6  | C12 | 160.0(4)  | C22  | N21 | C26 | C32  | -161.4(4) |
| C2  | C3  | C4  | C5  | -34.2(5)  | C22  | C23 | C24 | C25  | 32.8(6)   |
| C2  | C3  | C4  | C13 | 89.3(5)   | C22  | C23 | C24 | C33  | -91.6(5)  |
| C2  | C3  | C8  | O1  | 169.4(5)  | C22  | C23 | C28 | O21  | -178.8(5) |
| C2  | C3  | C8  | C9  | -8.3(7)   | C22  | C23 | C28 | C29  | -0.1(8)   |
| C3  | C4  | C5  | C6  | 28.9(6)   | C23  | C24 | C25 | C26  | -27.5(6)  |
| C3  | C4  | C5  | C10 | -155.0(4) | C23  | C24 | C25 | C30  | 156.6(4)  |
| C3  | C4  | C13 | N2  | -71.0(5)  | C23  | C24 | C33 | N22  | 72.0(5)   |
| C3  | C4  | C13 | C14 | 108.4(5)  | C23  | C24 | C33 | C34  | -107.3(5) |
| C4  | C3  | C8  | O1  | -6.1(7)   | C24  | C23 | C28 | O21  | 0.0(7)    |
| C4  | C3  | C8  | C9  | 176.3(4)  | C24  | C23 | C28 | C29  | 178.7(4)  |
| C4  | C5  | C6  | N1  | -5.3(6)   | C24  | C25 | C26 | N21  | 4.6(6)    |
| C4  | C5  | C6  | C12 | 177.9(4)  | C24  | C25 | C26 | C32  | -177.0(4) |
| C4  | C5  | C10 | O2  | 2.1(6)    | C24  | C25 | C30 | O22  | -1.8(6)   |
| C4  | C5  | C10 | C11 | -175.6(4) | C24  | C25 | C30 | C31  | 176.9(4)  |
| C4  | C13 | C14 | C11 | 0.2(7)    | C24  | C33 | C34 | C121 | -2.0(7)   |
| C4  | C13 | C14 | C15 | -178.6(4) | C24  | C33 | C34 | C35  | 179.5(4)  |
| C5  | C4  | C13 | N2  | 53.2(5)   | C25  | C24 | C33 | N22  | -53.3(5)  |
| C5  | C4  | C13 | C14 | -127.4(5) | C25  | C24 | C33 | C34  | 127.4(4)  |
| C6  | N1  | C2  | C3  | 11.8(7)   | C26  | N21 | C22 | C23  | -11.9(7)  |
| C6  | N1  | C2  | C7  | -167.4(4) | C26  | N21 | C22 | C27  | 165.9(4)  |
| C6  | C5  | C10 | O2  | 177.8(5)  | C26  | C25 | C30 | O22  | -177.2(5) |
| C6  | C5  | C10 | C11 | 0.0(7)    | C26  | C25 | C30 | C31  | 1.5(8)    |
| C7  | C2  | C3  | C4  | -165.5(5) | C27  | C22 | C23 | C24  | 168.0(5)  |
| C7  | C2  | C3  | C8  | 19.1(8)   | C27  | C22 | C23 | C28  | -13.2(8)  |
| C8  | C3  | C4  | C5  | 141.6(4)  | C28  | C23 | C24 | C25  | -146.1(4) |
| C8  | C3  | C4  | C13 | -94.9(5)  | C28  | C23 | C24 | C33  | 89.5(5)   |
| C10 | C5  | C6  | N1  | 179.3(4)  | C30  | C25 | C26 | N21  | 179.9(4)  |
| C10 | C5  | C6  | C12 | 2.4(8)    | C30  | C25 | C26 | C32  | -1.7(8)   |



|     |     |     |     |           |     |     |     |      |           |
|-----|-----|-----|-----|-----------|-----|-----|-----|------|-----------|
| C13 | C4  | C5  | C6  | -94.3(5)  | C33 | C24 | C25 | C26  | 96.7(5)   |
| C13 | C4  | C5  | C10 | 81.9(5)   | C33 | C24 | C25 | C30  | -79.2(5)  |
| C13 | C14 | C15 | C12 | -178.5(4) | C33 | C34 | C35 | C122 | -179.8(4) |
| C13 | C14 | C15 | S1  | -0.7(5)   | C33 | C34 | C35 | S21  | -0.2(5)   |
| C15 | S1  | N2  | C13 | 0.0(3)    | C35 | S21 | N22 | C33  | -0.2(3)   |

**Table S13.** Bond Lengths for **4**.

| Atom | Atom | Length/Å   | Atom | Atom | Length/Å |
|------|------|------------|------|------|----------|
| C11  | C8   | 1.7155(15) | C2   | C3   | 1.363(2) |
| C12  | C9   | 1.7031(16) | C3   | C4   | 1.515(2) |
| S1   | N3   | 1.6490(14) | C4   | C5   | 1.514(2) |
| S1   | C9   | 1.7056(16) | C4   | C7   | 1.519(2) |
| O1   | C2   | 1.3638(19) | C5   | C6   | 1.344(2) |
| O1   | C6   | 1.3873(18) | C5   | C10  | 1.488(2) |
| O2   | C10  | 1.222(2)   | C6   | C12  | 1.499(2) |
| N1   | C2   | 1.336(2)   | C7   | C8   | 1.424(2) |
| N2   | C1   | 1.153(2)   | C8   | C9   | 1.365(2) |
| N3   | C7   | 1.326(2)   | C10  | C11  | 1.501(2) |
| C1   | C3   | 1.416(2)   |      |      |          |

**Table S14.** Bond Angles for **4**.

| Atom | Atom | Atom | Angle/°    | Atom | Atom | Atom | Angle/°    |
|------|------|------|------------|------|------|------|------------|
| N3   | S1   | C9   | 94.76(7)   | O1   | C6   | C12  | 107.54(13) |
| C2   | O1   | C6   | 120.58(12) | C5   | C6   | O1   | 122.12(14) |
| C7   | N3   | S1   | 110.46(11) | C5   | C6   | C12  | 130.34(14) |
| N2   | C1   | C3   | 178.58(17) | N3   | C7   | C4   | 120.19(13) |
| N1   | C2   | O1   | 110.87(13) | N3   | C7   | C8   | 114.60(14) |
| N1   | C2   | C3   | 127.94(15) | C8   | C7   | C4   | 125.03(14) |
| C3   | C2   | O1   | 121.19(14) | C7   | C8   | C11  | 124.33(12) |
| C1   | C3   | C4   | 118.47(13) | C9   | C8   | C11  | 124.42(13) |
| C2   | C3   | C1   | 119.09(14) | C9   | C8   | C7   | 111.13(14) |
| C2   | C3   | C4   | 121.92(14) | C12  | C9   | S1   | 123.32(10) |
| C3   | C4   | C7   | 109.58(12) | C8   | C9   | C12  | 127.63(13) |
| C5   | C4   | C3   | 110.57(12) | C8   | C9   | S1   | 109.03(12) |
| C5   | C4   | C7   | 109.79(12) | O2   | C10  | C5   | 117.94(14) |
| C6   | C5   | C4   | 121.48(14) | O2   | C10  | C11  | 118.86(14) |
| C6   | C5   | C10  | 125.60(14) | C5   | C10  | C11  | 123.15(14) |
| C10  | C5   | C4   | 112.90(13) |      |      |      |            |

**Table S15.** Hydrogen Bonds for **4**.

| D  | H   | A               | d(D-H)/Å | d(H-A)/Å | d(D-A)/Å | D-H-A/° |
|----|-----|-----------------|----------|----------|----------|---------|
| N1 | H1A | O2 <sup>1</sup> | 0.88(3)  | 2.11(3)  | 2.984(2) | 172(2)  |

|    |     |                 |         |         |          |        |
|----|-----|-----------------|---------|---------|----------|--------|
| N1 | H1B | N2 <sup>2</sup> | 0.82(3) | 2.28(3) | 3.088(2) | 168(2) |
|----|-----|-----------------|---------|---------|----------|--------|

<sup>1</sup>1+X,+Y,+Z; <sup>2</sup>1-X,1-Y,2-Z

**Table S16.** Torsion Angles for **4**.

| A   | B  | C  | D   | Angle/°     | A   | B  | C   | D   | Angle/°     |
|-----|----|----|-----|-------------|-----|----|-----|-----|-------------|
| C11 | C8 | C9 | C12 | 3.5(2)      | C3  | C4 | C7  | C8  | -86.44(17)  |
| C11 | C8 | C9 | S1  | -175.24(9)  | C4  | C5 | C6  | O1  | 3.6(2)      |
| S1  | N3 | C7 | C4  | -174.74(11) | C4  | C5 | C6  | C12 | -175.96(15) |
| S1  | N3 | C7 | C8  | 0.72(17)    | C4  | C5 | C10 | O2  | -14.2(2)    |
| O1  | C2 | C3 | C1  | -177.12(13) | C4  | C5 | C10 | C11 | 163.16(15)  |
| O1  | C2 | C3 | C4  | -5.5(2)     | C4  | C7 | C8  | C11 | -9.7(2)     |
| N1  | C2 | C3 | C1  | 3.3(3)      | C4  | C7 | C8  | C9  | 174.03(14)  |
| N1  | C2 | C3 | C4  | 174.91(15)  | C5  | C4 | C7  | N3  | -33.11(18)  |
| N3  | S1 | C9 | C12 | -179.38(10) | C5  | C4 | C7  | C8  | 151.94(14)  |
| N3  | S1 | C9 | C8  | -0.59(12)   | C6  | O1 | C2  | N1  | 172.93(13)  |
| N3  | C7 | C8 | C11 | 175.11(11)  | C6  | O1 | C2  | C3  | -6.7(2)     |
| N3  | C7 | C8 | C9  | -1.2(2)     | C6  | C5 | C10 | O2  | 167.22(16)  |
| C1  | C3 | C4 | C5  | -173.48(13) | C6  | C5 | C10 | C11 | -15.4(3)    |
| C1  | C3 | C4 | C7  | 65.37(17)   | C7  | C4 | C5  | C6  | 107.16(16)  |
| C2  | O1 | C6 | C5  | 7.7(2)      | C7  | C4 | C5  | C10 | -71.51(16)  |
| C2  | O1 | C6 | C12 | -172.61(13) | C7  | C8 | C9  | C12 | 179.77(11)  |
| C2  | C3 | C4 | C5  | 14.9(2)     | C7  | C8 | C9  | S1  | 1.05(17)    |
| C2  | C3 | C4 | C7  | -106.25(16) | C9  | S1 | N3  | C7  | -0.08(12)   |
| C3  | C4 | C5 | C6  | -13.9(2)    | C10 | C5 | C6  | O1  | -177.92(14) |
| C3  | C4 | C5 | C10 | 167.46(12)  | C10 | C5 | C6  | C12 | 2.5(3)      |
| C3  | C4 | C7 | N3  | 88.52(16)   |     |    |     |     |             |

**Table S17.** Bond Lengths for **5**.

| Atom | Atom | Length/Å | Atom | Atom | Length/Å |
|------|------|----------|------|------|----------|
| C11  | C13  | 1.713(3) | C2   | C3   | 1.358(4) |
| C12  | C14  | 1.703(3) | C3   | C4   | 1.521(4) |
| S1   | N1   | 1.659(2) | C3   | C11  | 1.412(4) |
| S1   | C14  | 1.704(3) | C4   | C5   | 1.511(4) |
| O1   | C2   | 1.360(3) | C4   | C12  | 1.524(3) |
| O1   | C6   | 1.382(3) | C5   | C6   | 1.337(3) |
| O2   | C7   | 1.206(3) | C5   | C7   | 1.479(4) |
| O3   | C7   | 1.342(3) | C6   | C10  | 1.487(4) |
| O3   | C8   | 1.452(3) | C8   | C9   | 1.507(4) |
| N1   | C12  | 1.313(3) | C12  | C13  | 1.423(4) |
| N2   | C2   | 1.336(3) | C13  | C14  | 1.368(4) |
| N3   | C11  | 1.154(4) |      |      |          |

**Table S18.** Bond Angles for **5**.

| Atom | Atom | Atom | Angle/°    | Atom | Atom | Atom | Angle/°    |
|------|------|------|------------|------|------|------|------------|
| N1   | S1   | C14  | 94.03(12)  | C5   | C6   | O1   | 121.6(3)   |
| C2   | O1   | C6   | 120.8(2)   | C5   | C6   | C10  | 130.8(2)   |
| C7   | O3   | C8   | 115.6(2)   | O2   | C7   | O3   | 123.5(3)   |
| C12  | N1   | S1   | 111.02(19) | O2   | C7   | C5   | 122.6(3)   |
| N2   | C2   | O1   | 110.0(2)   | O3   | C7   | C5   | 113.9(2)   |
| N2   | C2   | C3   | 128.2(3)   | O3   | C8   | C9   | 106.2(2)   |
| C3   | C2   | O1   | 121.8(2)   | N3   | C11  | C3   | 179.3(3)   |
| C2   | C3   | C4   | 122.1(3)   | N1   | C12  | C4   | 121.0(2)   |
| C2   | C3   | C11  | 118.0(2)   | N1   | C12  | C13  | 114.7(2)   |
| C11  | C3   | C4   | 119.7(2)   | C13  | C12  | C4   | 124.3(2)   |
| C3   | C4   | C12  | 110.7(2)   | C12  | C13  | C11  | 125.0(2)   |
| C5   | C4   | C3   | 110.1(2)   | C14  | C13  | C11  | 124.1(2)   |
| C5   | C4   | C12  | 112.2(2)   | C14  | C13  | C12  | 110.9(2)   |
| C6   | C5   | C4   | 123.1(2)   | C12  | C14  | S1   | 124.54(16) |
| C6   | C5   | C7   | 124.1(3)   | C13  | C14  | C12  | 126.0(2)   |
| C7   | C5   | C4   | 112.8(2)   | C13  | C14  | S1   | 109.4(2)   |
| O1   | C6   | C10  | 107.6(2)   |      |      |      |            |

**Table S19.** Hydrogen Bonds for **5**.

| D   | H    | A               | d(D-H)/Å | d(H-A)/Å | d(D-A)/Å | D-H-A/° |
|-----|------|-----------------|----------|----------|----------|---------|
| N2  | H2A  | N3 <sup>1</sup> | 0.84(3)  | 2.22(3)  | 3.056(4) | 169(3)  |
| N2  | H2B  | N1 <sup>2</sup> | 0.89(3)  | 2.19(3)  | 3.069(3) | 170(3)  |
| C4  | H4A  | C11             | 1.00     | 2.74     | 3.269(3) | 113.6   |
| C10 | H10B | N3 <sup>3</sup> | 0.98     | 2.57     | 3.532(4) | 166.5   |

<sup>1</sup>1-X,2-Y,2-Z; <sup>2</sup>1-X,1-Y,2-Z; <sup>3</sup>+X,-1+Y,+Z

**Table S20.** Torsion Angles for **5**.

| A   | B   | C   | D   | Angle/°     | A  | B   | C   | D   | Angle/°  |
|-----|-----|-----|-----|-------------|----|-----|-----|-----|----------|
| C11 | C13 | C14 | C12 | -1.6(4)     | C4 | C5  | C7  | O2  | -0.4(4)  |
| C11 | C13 | C14 | S1  | -179.65(17) | C4 | C5  | C7  | O3  | 179.8(2) |
| S1  | N1  | C12 | C4  | -177.8(2)   | C4 | C12 | C13 | C11 | -2.4(4)  |
| S1  | N1  | C12 | C13 | 0.5(3)      | C4 | C12 | C13 | C14 | 178.0(3) |
| O1  | C2  | C3  | C4  | -3.5(4)     | C5 | C4  | C12 | N1  | -55.3(3) |
| O1  | C2  | C3  | C11 | -180.0(2)   | C5 | C4  | C12 | C13 | 126.5(3) |
| N1  | S1  | C14 | C12 | -177.75(19) | C6 | O1  | C2  | N2  | 177.2(2) |
| N1  | S1  | C14 | C13 | 0.3(2)      | C6 | O1  | C2  | C3  | -1.5(4)  |
| N1  | C12 | C13 | C11 | 179.3(2)    | C6 | C5  | C7  | O2  | 179.0(3) |
| N1  | C12 | C13 | C14 | -0.3(4)     | C6 | C5  | C7  | O3  | -0.8(4)  |
| N2  | C2  | C3  | C4  | 178.1(3)    | C7 | O3  | C8  | C9  | 177.5(2) |

|    |    |     |     |           |     |     |     |     |           |
|----|----|-----|-----|-----------|-----|-----|-----|-----|-----------|
| N2 | C2 | C3  | C11 | 1.6(4)    | C7  | C5  | C6  | O1  | -177.5(2) |
| C2 | O1 | C6  | C5  | 2.4(4)    | C7  | C5  | C6  | C10 | 2.6(5)    |
| C2 | O1 | C6  | C10 | -177.7(2) | C8  | O3  | C7  | O2  | 1.4(4)    |
| C2 | C3 | C4  | C5  | 6.7(4)    | C8  | O3  | C7  | C5  | -178.8(2) |
| C2 | C3 | C4  | C12 | -117.9(3) | C11 | C3  | C4  | C5  | -176.8(2) |
| C3 | C4 | C5  | C6  | -6.0(4)   | C11 | C3  | C4  | C12 | 58.6(3)   |
| C3 | C4 | C5  | C7  | 173.4(2)  | C12 | C4  | C5  | C6  | 117.8(3)  |
| C3 | C4 | C12 | N1  | 68.1(3)   | C12 | C4  | C5  | C7  | -62.8(3)  |
| C3 | C4 | C12 | C13 | -110.1(3) | C12 | C13 | C14 | C12 | 178.0(2)  |
| C4 | C5 | C6  | O1  | 1.9(4)    | C12 | C13 | C14 | S1  | 0.0(3)    |
| C4 | C5 | C6  | C10 | -178.1(3) | C14 | S1  | N1  | C12 | -0.5(2)   |

Table S21. Bond Lengths for 6.

| Atom | Atom | Length/Å | Atom | Atom | Length/Å |
|------|------|----------|------|------|----------|
| C11  | C11  | 1.710(3) | C121 | C31  | 1.714(3) |
| C12  | C12  | 1.703(3) | C122 | C32  | 1.706(3) |
| S1   | N2   | 1.653(2) | S21  | N22  | 1.650(2) |
| S1   | C12  | 1.704(3) | S21  | C32  | 1.703(3) |
| O1   | C2   | 1.384(3) | O21  | C22  | 1.383(3) |
| O1   | C6   | 1.366(3) | O21  | C26  | 1.375(3) |
| O2   | C8   | 1.227(3) | O22  | C28  | 1.220(3) |
| O3   | C13  | 1.221(3) | O23  | C33  | 1.227(3) |
| O4   | C13  | 1.358(3) | O24  | C33  | 1.351(3) |
| O4   | C14  | 1.453(3) | O24  | C34  | 1.460(3) |
| N1   | C6   | 1.346(3) | N21  | C26  | 1.342(4) |
| N2   | C10  | 1.312(3) | N22  | C30  | 1.316(3) |
| C2   | C3   | 1.343(4) | C22  | C23  | 1.342(4) |
| C2   | C7   | 1.491(4) | C22  | C27  | 1.497(4) |
| C3   | C4   | 1.515(4) | C23  | C24  | 1.522(4) |
| C3   | C8   | 1.478(4) | C23  | C28  | 1.489(4) |
| C4   | C5   | 1.508(4) | C24  | C25  | 1.518(4) |
| C4   | C10  | 1.521(3) | C24  | C30  | 1.516(4) |
| C5   | C6   | 1.362(4) | C25  | C26  | 1.353(4) |
| C5   | C13  | 1.452(4) | C25  | C33  | 1.449(4) |
| C8   | C9   | 1.502(4) | C28  | C29  | 1.508(4) |
| C10  | C11  | 1.433(3) | C30  | C31  | 1.426(4) |
| C11  | C12  | 1.365(4) | C31  | C32  | 1.361(4) |
| C14  | C15  | 1.510(4) | C34  | C35  | 1.491(4) |

Table S22. Bond Angles for 6.

| Atom | Atom | Atom | Angle/°   | Atom | Atom | Atom | Angle/°   |
|------|------|------|-----------|------|------|------|-----------|
| N2   | S1   | C12  | 94.53(13) | N22  | S21  | C32  | 94.30(13) |
| C6   | O1   | C2   | 119.9(2)  | C26  | O21  | C22  | 119.6(2)  |

|     |     |     |            |     |     |      |            |
|-----|-----|-----|------------|-----|-----|------|------------|
| C13 | O4  | C14 | 114.8(2)   | C33 | O24 | C34  | 117.9(2)   |
| C10 | N2  | S1  | 110.64(18) | C30 | N22 | S21  | 110.63(18) |
| O1  | C2  | C7  | 107.8(2)   | O21 | C22 | C27  | 107.9(2)   |
| C3  | C2  | O1  | 120.9(2)   | C23 | C22 | O21  | 121.3(2)   |
| C3  | C2  | C7  | 131.3(3)   | C23 | C22 | C27  | 130.8(3)   |
| C2  | C3  | C4  | 119.9(2)   | C22 | C23 | C24  | 120.9(2)   |
| C2  | C3  | C8  | 125.8(3)   | C22 | C23 | C28  | 124.2(2)   |
| C8  | C3  | C4  | 114.3(2)   | C28 | C23 | C24  | 114.9(2)   |
| C3  | C4  | C10 | 109.2(2)   | C25 | C24 | C23  | 109.7(2)   |
| C5  | C4  | C3  | 110.7(2)   | C30 | C24 | C23  | 109.0(2)   |
| C5  | C4  | C10 | 111.1(2)   | C30 | C24 | C25  | 110.9(2)   |
| C6  | C5  | C4  | 119.4(2)   | C26 | C25 | C24  | 120.2(2)   |
| C6  | C5  | C13 | 119.5(2)   | C26 | C25 | C33  | 119.5(2)   |
| C13 | C5  | C4  | 121.1(2)   | C33 | C25 | C24  | 120.1(2)   |
| N1  | C6  | O1  | 110.4(2)   | N21 | C26 | O21  | 110.2(2)   |
| N1  | C6  | C5  | 128.3(3)   | N21 | C26 | C25  | 127.9(3)   |
| C5  | C6  | O1  | 121.3(2)   | C25 | C26 | O21  | 121.9(2)   |
| O2  | C8  | C3  | 117.7(2)   | O22 | C28 | C23  | 118.6(2)   |
| O2  | C8  | C9  | 119.2(3)   | O22 | C28 | C29  | 119.3(3)   |
| C3  | C8  | C9  | 123.0(2)   | C23 | C28 | C29  | 122.0(2)   |
| N2  | C10 | C4  | 119.4(2)   | N22 | C30 | C24  | 118.8(2)   |
| N2  | C10 | C11 | 115.0(2)   | N22 | C30 | C31  | 115.0(2)   |
| C11 | C10 | C4  | 125.7(2)   | C31 | C30 | C24  | 126.3(2)   |
| C10 | C11 | Cl1 | 125.3(2)   | C30 | C31 | Cl21 | 125.6(2)   |
| C12 | C11 | Cl1 | 124.2(2)   | C32 | C31 | Cl21 | 124.0(2)   |
| C12 | C11 | C10 | 110.5(2)   | C32 | C31 | C30  | 110.5(2)   |
| Cl2 | C12 | S1  | 122.64(17) | S21 | C32 | Cl22 | 122.46(17) |
| C11 | C12 | Cl2 | 128.0(2)   | C31 | C32 | Cl22 | 127.9(2)   |
| C11 | C12 | S1  | 109.4(2)   | C31 | C32 | S21  | 109.6(2)   |
| O3  | C13 | O4  | 122.3(2)   | O23 | C33 | O24  | 122.9(3)   |
| O3  | C13 | C5  | 126.0(2)   | O23 | C33 | C25  | 125.5(3)   |
| O4  | C13 | C5  | 111.7(2)   | O24 | C33 | C25  | 111.7(2)   |
| O4  | C14 | C15 | 107.8(2)   | O24 | C34 | C35  | 110.5(2)   |

**Table S23.** Hydrogen Bonds for **6**.

| <b>D</b> | <b>H</b> | <b>A</b>         | <b>d(D-H)/Å</b> | <b>d(H-A)/Å</b> | <b>d(D-A)/Å</b> | <b>D-H-A/°</b> |
|----------|----------|------------------|-----------------|-----------------|-----------------|----------------|
| N1       | H1A      | O3               | 0.89(3)         | 2.10(3)         | 2.741(3)        | 128(3)         |
| N1       | H1B      | N2 <sup>1</sup>  | 0.83(3)         | 2.57(3)         | 3.324(4)        | 152(3)         |
| C4       | H4A      | Cl1              | 1.00            | 2.80            | 3.311(3)        | 112.2          |
| N21      | H21A     | O23              | 0.84(4)         | 2.05(3)         | 2.710(4)        | 135(3)         |
| N21      | H21B     | O2               | 0.79(3)         | 2.22(3)         | 2.989(3)        | 162(4)         |
| C24      | H24A     | Cl21             | 1.00            | 2.83            | 3.323(3)        | 111.4          |
| C27      | H27B     | N22 <sup>2</sup> | 0.98            | 2.60            | 3.351(3)        | 133.9          |
| C29      | H29A     | S1 <sup>3</sup>  | 0.98            | 2.82            | 3.767(3)        | 163.0          |

|     |      |                  |      |      |          |       |
|-----|------|------------------|------|------|----------|-------|
| C35 | H35C | O23 <sup>4</sup> | 0.98 | 2.54 | 3.311(4) | 135.5 |
|-----|------|------------------|------|------|----------|-------|

<sup>1</sup>1-X,-1/2+Y,2-Z; <sup>2</sup>1-X,1/2+Y,1-Z; <sup>3</sup>1-X,-1/2+Y,1-Z; <sup>4</sup>2-X,-1/2+Y,1-Z

**Table S24.** Torsion Angles for **6**.

| A   | B   | C   | D   | Angle/°     | A    | B   | C   | D    | Angle/°     |
|-----|-----|-----|-----|-------------|------|-----|-----|------|-------------|
| C11 | C11 | C12 | C12 | 2.6(4)      | C121 | C31 | C32 | C122 | -2.4(4)     |
| C11 | C11 | C12 | S1  | -178.71(14) | C121 | C31 | C32 | S21  | -179.46(15) |
| S1  | N2  | C10 | C4  | 178.03(18)  | S21  | N22 | C30 | C24  | -179.56(19) |
| S1  | N2  | C10 | C11 | -1.2(3)     | S21  | N22 | C30 | C31  | 0.2(3)      |
| O1  | C2  | C3  | C4  | -7.8(4)     | O21  | C22 | C23 | C24  | 7.9(4)      |
| O1  | C2  | C3  | C8  | 175.0(2)    | O21  | C22 | C23 | C28  | -174.6(2)   |
| N2  | S1  | C12 | C12 | 177.90(17)  | N22  | S21 | C32 | C122 | -176.50(18) |
| N2  | S1  | C12 | C11 | -0.9(2)     | N22  | S21 | C32 | C31  | 0.7(2)      |
| N2  | C10 | C11 | C11 | 179.59(19)  | N22  | C30 | C31 | C121 | 179.1(2)    |
| N2  | C10 | C11 | C12 | 0.5(3)      | N22  | C30 | C31 | C32  | 0.3(3)      |
| C2  | O1  | C6  | N1  | -162.0(2)   | C22  | O21 | C26 | N21  | 165.0(2)    |
| C2  | O1  | C6  | C5  | 19.4(4)     | C22  | O21 | C26 | C25  | -15.5(4)    |
| C2  | C3  | C4  | C5  | 26.9(3)     | C22  | C23 | C24 | C25  | -24.6(3)    |
| C2  | C3  | C4  | C10 | -95.7(3)    | C22  | C23 | C24 | C30  | 97.0(3)     |
| C2  | C3  | C8  | O2  | 167.7(3)    | C22  | C23 | C28 | O22  | -162.2(3)   |
| C2  | C3  | C8  | C9  | -15.2(4)    | C22  | C23 | C28 | C29  | 20.8(4)     |
| C3  | C4  | C5  | C6  | -24.4(3)    | C23  | C24 | C25 | C26  | 22.7(3)     |
| C3  | C4  | C5  | C13 | 157.8(2)    | C23  | C24 | C25 | C33  | -161.9(2)   |
| C3  | C4  | C10 | N2  | 60.2(3)     | C23  | C24 | C30 | N22  | -61.2(3)    |
| C3  | C4  | C10 | C11 | -120.7(3)   | C23  | C24 | C30 | C31  | 119.1(3)    |
| C4  | C3  | C8  | O2  | -9.6(4)     | C24  | C23 | C28 | O22  | 15.5(4)     |
| C4  | C3  | C8  | C9  | 167.4(2)    | C24  | C23 | C28 | C29  | -161.5(2)   |
| C4  | C5  | C6  | O1  | 2.8(4)      | C24  | C25 | C26 | O21  | -4.3(4)     |
| C4  | C5  | C6  | N1  | -175.5(3)   | C24  | C25 | C26 | N21  | 175.1(3)    |
| C4  | C5  | C13 | O3  | 175.2(3)    | C24  | C25 | C33 | O23  | -175.7(2)   |
| C4  | C5  | C13 | O4  | -4.6(4)     | C24  | C25 | C33 | O24  | 4.9(3)      |
| C4  | C10 | C11 | C11 | 0.4(4)      | C24  | C30 | C31 | C121 | -1.2(4)     |
| C4  | C10 | C11 | C12 | -178.6(2)   | C24  | C30 | C31 | C32  | -179.9(2)   |
| C5  | C4  | C10 | N2  | -62.2(3)    | C25  | C24 | C30 | N22  | 59.7(3)     |
| C5  | C4  | C10 | C11 | 116.9(3)    | C25  | C24 | C30 | C31  | -120.0(3)   |
| C6  | O1  | C2  | C3  | -16.8(4)    | C26  | O21 | C22 | C23  | 13.6(4)     |
| C6  | O1  | C2  | C7  | 165.1(2)    | C26  | O21 | C22 | C27  | -168.3(2)   |
| C6  | C5  | C13 | O3  | -2.6(4)     | C26  | C25 | C33 | O23  | -0.2(4)     |
| C6  | C5  | C13 | O4  | 177.6(2)    | C26  | C25 | C33 | O24  | -179.6(2)   |
| C7  | C2  | C3  | C4  | 169.8(3)    | C27  | C22 | C23 | C24  | -169.6(3)   |
| C7  | C2  | C3  | C8  | -7.4(5)     | C27  | C22 | C23 | C28  | 7.9(5)      |
| C8  | C3  | C4  | C5  | -155.5(2)   | C28  | C23 | C24 | C25  | 157.7(2)    |
| C8  | C3  | C4  | C10 | 81.9(3)     | C28  | C23 | C24 | C30  | -80.7(3)    |

|     |     |     |     |           |     |     |     |      |           |
|-----|-----|-----|-----|-----------|-----|-----|-----|------|-----------|
| C10 | C4  | C5  | C6  | 97.1(3)   | C30 | C24 | C25 | C26  | -97.8(3)  |
| C10 | C4  | C5  | C13 | -80.6(3)  | C30 | C24 | C25 | C33  | 77.6(3)   |
| C10 | C11 | C12 | C12 | -178.3(2) | C30 | C31 | C32 | C122 | 176.3(2)  |
| C10 | C11 | C12 | S1  | 0.4(3)    | C30 | C31 | C32 | S21  | -0.7(3)   |
| C12 | S1  | N2  | C10 | 1.2(2)    | C32 | S21 | N22 | C30  | -0.5(2)   |
| C13 | O4  | C14 | C15 | 175.7(2)  | C33 | O24 | C34 | C35  | 114.3(3)  |
| C13 | C5  | C6  | O1  | -179.4(2) | C33 | C25 | C26 | O21  | -179.7(2) |
| C13 | C5  | C6  | N1  | 2.3(4)    | C33 | C25 | C26 | N21  | -0.4(4)   |
| C14 | O4  | C13 | O3  | 0.0(4)    | C34 | O24 | C33 | O23  | -5.6(4)   |
| C14 | O4  | C13 | C5  | 179.8(2)  | C34 | O24 | C33 | C25  | 173.8(2)  |
